# Supplementary material for: Health-Related Social Needs during the COVID-19 Pandemic: The Chronic Renal Insufficiency Cohort (CRIC) Study
Source: PubMed Central journal article supplement (PMC11219102; doi:10.34067/kid.0000000000000439), 2024-04-15
Supplement: kidney360-5-900-s001.pdf [file kidney360-5-900-s001.pdf]

## ASN Journal Disclosure Form

As per ASN journal policy, I have disclosed any financial relationship or commitment held by myself and/or my spouse/partner in the past 36 months as included below. I have listed my Current Employer below to indicate there is a relationship requiring disclosure. If no relationship exists, my Current Employer is not listed.

A. Allen reports the following:

Employer: University of Pennsylvania

I understand that the information above will be published within the journal article, if accepted, and that failure to comply and/or to accurately and completely report the potential financial conflicts of interest could lead to the following: 1) Prior to publication, article rejection, or 2) Post-publication, sanctions ranging from, but not limited to, issuing a correction, reporting the inaccurate information to the authors' institution, banning authors from submitting work to ASN journals for varying lengths of time, and/or retraction of the published work.

Name: Angela Allen

Manuscript ID: K360-2023-000878R1

Manuscript Title: Health-Related Social Needs During the COVID-19 Pandemic: the Chronic Renal Insufficiency Cohort (CRIC) Study

Date of Completion: March 5, 2024

Disclosure Updated Date: May 24, 2023

## ASN Journal Disclosure Form

As per ASN journal policy, I have disclosed any financial relationship or commitment held by myself and/or my spouse/partner in the past 36 months as included below. I have listed my Current Employer below to indicate there is a relationship requiring disclosure. If no relationship exists, my Current Employer is not listed.

L. Appel reports the following:

Employer: Johns Hopkins University; Consultancy: Wolters Kluwer for chapters in UpToDate; Honoraria: Wolters Kluwer; and Other Interests or Relationships: Bloomberg Philanthropies.

I understand that the information above will be published within the journal article, if accepted, and that failure to comply and/or to accurately and completely report the potential financial conflicts of interest could lead to the following: 1) Prior to publication, article rejection, or 2) Post-publication, sanctions ranging from, but not limited to, issuing a correction, reporting the inaccurate information to the authors' institution, banning authors from submitting work to ASN journals for varying lengths of time, and/or retraction of the published work.

Name: Lawrence J. Appel

Manuscript ID: K360-2023-000878R1

Manuscript Title: Health-Related Social Needs During the COVID-19 Pandemic: the Chronic Renal Insufficiency Cohort (CRIC) Study

Date of Completion: March 7, 2024

Disclosure Updated Date: May 17, 2023

## ASN Journal Disclosure Form

As per ASN journal policy, I have disclosed any financial relationship or commitment held by myself and/or my spouse/partner in the past 36 months as included below. I have listed my Current Employer below to indicate there is a relationship requiring disclosure. If no relationship exists, my Current Employer is not listed.

J. Charleston reports the following:

Employer: Johns Hopkins University

I understand that the information above will be published within the journal article, if accepted, and that failure to comply and/or to accurately and completely report the potential financial conflicts of interest could lead to the following: 1) Prior to publication, article rejection, or 2) Post-publication, sanctions ranging from, but not limited to, issuing a correction, reporting the inaccurate information to the authors' institution, banning authors from submitting work to ASN journals for varying lengths of time, and/or retraction of the published work.

Name: Jeanne Charleston

Manuscript ID: K3602023000878R1

Manuscript Title: Health-Related Social Needs During the COVID-19 Pandemic: the Chronic Renal Insufficiency Cohort (CRIC) Study," submitted to the Kidney360.

Date of Completion: March 27, 2024

Disclosure Updated Date: March 27, 2024

## ASN Journal Disclosure Form

As per ASN journal policy, I have disclosed any financial relationship or commitment held by myself and/or my spouse/partner in the past 36 months as included below. I have listed my Current Employer below to indicate there is a relationship requiring disclosure. If no relationship exists, my Current Employer is not listed.

D. Cohen reports the following:

Employer: University of Pennsylvania; Consultancy: Medtronic, Recor, novartis; Ownership Interest: incyte - spouse; Research Funding: Medtronic; Recor, NIDDK CRIC study; Honoraria: Medtronic, Recor, novartis; Patents or Royalties: incyte - spouse; Advisory or Leadership Role: spouse - kura oncology; and Speakers Bureau: Medtronic.

I understand that the information above will be published within the journal article, if accepted, and that failure to comply and/or to accurately and completely report the potential financial conflicts of interest could lead to the following: 1) Prior to publication, article rejection, or 2) Post-publication, sanctions ranging from, but not limited to, issuing a correction, reporting the inaccurate information to the authors' institution, banning authors from submitting work to ASN journals for varying lengths of time, and/or retraction of the published work.

Name: Debbie L. Cohen

Manuscript ID: K360-2023-000878R1

Manuscript Title: Health-Related Social Needs During the COVID-19 Pandemic: the Chronic Renal Insufficiency Cohort (CRIC) Study

Date of Completion: February 5, 2024

Disclosure Updated Date: February 5, 2024

## ASN Journal Disclosure Form

As per ASN journal policy, I have disclosed any financial relationship or commitment held by myself and/or my spouse/partner in the past 36 months as included below. I have listed my Current Employer below to indicate there is a relationship requiring disclosure. If no relationship exists, my Current Employer is not listed.

D. Crews reports the following:

Employer: Johns Hopkins University; Consultancy: Yale New Haven Health Services Corporation Center for Outcomes Research and Evaluation (CORE); Research Funding: Somatus, Inc.; Baxter International; Advisory or Leadership Role: Editorial Board--Journal of Renal Nutrition, Clinical Journal of the American Society of Nephrology, Journal of the American Society of Nephrology; Advisory Group, Health Equity Collaborative, Partner Research for Equitable System Transformation after COVID-19 (PRESTAC), Optum Labs; and Other Interests or Relationships: Executive Councilor, American Society of Nephrology.

I understand that the information above will be published within the journal article, if accepted, and that failure to comply and/or to accurately and completely report the potential financial conflicts of interest could lead to the following: 1) Prior to publication, article rejection, or 2) Post-publication, sanctions ranging from, but not limited to, issuing a correction, reporting the inaccurate information to the authors' institution, banning authors from submitting work to ASN journals for varying lengths of time, and/or retraction of the published work.

Name: Deidra C. Crews

Manuscript ID: K360-2023-000878R1

Manuscript Title: Health-Related Social Needs During the COVID-19 Pandemic: the Chronic Renal Insufficiency Cohort (CRIC) Study

Date of Completion: February 6, 2024

Disclosure Updated Date: January 10, 2024

## ASN Journal Disclosure Form

As per ASN journal policy, I have disclosed any financial relationship or commitment held by myself and/or my spouse/partner in the past 36 months as included below. I have listed my Current Employer below to indicate there is a relationship requiring disclosure. If no relationship exists, my Current Employer is not listed.

J. Lash reports the following:

Employer: University of Illinois at Chicago; and Advisory or Leadership Role: Kidney360.

I understand that the information above will be published within the journal article, if accepted, and that failure to comply and/or to accurately and completely report the potential financial conflicts of interest could lead to the following: 1) Prior to publication, article rejection, or 2) Post-publication, sanctions ranging from, but not limited to, issuing a correction, reporting the inaccurate information to the authors' institution, banning authors from submitting work to ASN journals for varying lengths of time, and/or retraction of the published work.

Name: James P. Lash

Manuscript ID: K360-2023-000878R1

Manuscript Title: Health-Related Social Needs During the COVID-19 Pandemic: the Chronic Renal Insufficiency Cohort (CRIC) Study,

Date of Completion: February 6, 2024

Disclosure Updated Date: March 4, 2023

## ASN Journal Disclosure Form

As per ASN journal policy, I have disclosed any financial relationship or commitment held by myself and/or my spouse/partner in the past 36 months as included below. I have listed my Current Employer below to indicate there is a relationship requiring disclosure. If no relationship exists, my Current Employer is not listed.

N. Meza reports the following:

Employer: University of Illinois at Chicago; and Patents or Royalties: UIC Midwest Latino Health Research Training and Policy Center.

I understand that the information above will be published within the journal article, if accepted, and that failure to comply and/or to accurately and completely report the potential financial conflicts of interest could lead to the following: 1) Prior to publication, article rejection, or 2) Post-publication, sanctions ranging from, but not limited to, issuing a correction, reporting the inaccurate information to the authors' institution, banning authors from submitting work to ASN journals for varying lengths of time, and/or retraction of the published work.

Name: Natalie Meza

Manuscript ID: K360-2023-000878R1

Manuscript Title: Health-Related Social Needs During the COVID-19 Pandemic: the Chronic Renal Insufficiency Cohort (CRIC) Study

Date of Completion: February 27, 2024

Disclosure Updated Date: February 27, 2024

## ASN Journal Disclosure Form

As per ASN journal policy, I have disclosed any financial relationship or commitment held by myself and/or my spouse/partner in the past 36 months as included below. I have listed my Current Employer below to indicate there is a relationship requiring disclosure. If no relationship exists, my Current Employer is not listed.

T. Novick reports the following:

Employer: University of Texas at Austin Dell Medical School

I understand that the information above will be published within the journal article, if accepted, and that failure to comply and/or to accurately and completely report the potential financial conflicts of interest could lead to the following: 1) Prior to publication, article rejection, or 2) Post-publication, sanctions ranging from, but not limited to, issuing a correction, reporting the inaccurate information to the authors' institution, banning authors from submitting work to ASN journals for varying lengths of time, and/or retraction of the published work.

Name: Tessa Kimberly Novick

Manuscript ID: K360-2023-000878R1

Manuscript Title: Health-Related Social Needs During the COVID-19 Pandemic: the Chronic Renal Insufficiency Cohort (CRIC Study")

Date of Completion: February 6, 2024

Disclosure Updated Date: August 21, 2023



## ASN Journal Disclosure Form

As per ASN journal policy, I have disclosed any financial relationship or commitment held by myself and/or my spouse/partner in the past 36 months as included below. I have listed my Current Employer below to indicate there is a relationship requiring disclosure. If no relationship exists, my Current Employer is not listed.

M. Osuna-Diaz reports the following:

Employer: University of Texas at Austin - Dell Medical School

I understand that the information above will be published within the journal article, if accepted, and that failure to comply and/or to accurately and completely report the potential financial conflicts of interest could lead to the following: 1) Prior to publication, article rejection, or 2) Post-publication, sanctions ranging from, but not limited to, issuing a correction, reporting the inaccurate information to the authors' institution, banning authors from submitting work to ASN journals for varying lengths of time, and/or retraction of the published work.

Name: Michelle Marie Osuna-Diaz

Manuscript ID: K360-2023-000878R1

Manuscript Title: Health-Related Social Needs During the COVID-19 Pandemic: the Chronic Renal Insufficiency Cohort (CRIC) Study

Date of Completion: February 5, 2024

Disclosure Updated Date: February 5, 2024
